# Supplementary material for: First-principles theoretical study on dry reforming of methane over perfect and boron-vacancy-containing h-BN sheet-supported Ni catalysts
Source: Royal Society of Chemistry journal article supplement (doi:10.1039/d0cp04732e), 2020-11-25
Supplement: d0cp04732e1.pdf [file d0cp04732e1.pdf]

## *Supporting information*

# **First-Principles Theory Study on Dry Reforming of Methane over Perfect and Boron Vacancies of h-BN Sheets Supported Ni Catalysts**

Yan Zhang, Yi-Fan Yao, Yuan-Yuan Qiao, Gui-Chang Wang\*

(Key Laboratory of Advanced Energy Materials Chemistry (Ministry of Education) and the Tianjin key Lab and Molecule-based Material Chemistry, College of Chemistry, Nankai University, Tianjin 300071, China)

\*Corresponding author: Gui-Chang Wang. E-mail: [wanguichang@nankai.edu.cn](mailto:wanguichang@nankai.edu.cn)

Telephone: +86-22-23502458 (O) Fax: +86-22-23502458

**Table S1** Standard entropy of gas phase material at 973.15 K

| Species          | $S^\circ(\text{J/mol}\cdot\text{K})^{[2]}$ |
|------------------|--------------------------------------------|
| CH <sub>4</sub>  | 245.61                                     |
| CO <sub>2</sub>  | 267.82                                     |
| H <sub>2</sub>   | 165.39                                     |
| CO               | 233.63                                     |
| H <sub>2</sub> O | 231.62                                     |

**Table S2** Calculated energy barriers ( $E_a$ ) and reaction energy ( $\Delta E$ ) for all the elementary reactions involved in dry reforming of methane.

|   | Catalyst                  | CH <sub>4</sub> * $\rightarrow$ CH <sub>3</sub> *+H* |                       | CO <sub>2</sub> * $\rightarrow$ CO*+O* |                       |
|---|---------------------------|------------------------------------------------------|-----------------------|----------------------------------------|-----------------------|
|   |                           | $E_a(\text{eV})$                                     | $\Delta E(\text{eV})$ | $E_a(\text{eV})$                       | $\Delta E(\text{eV})$ |
| 1 | Ni <sub>1</sub> /h-BN     | 0.46                                                 | 0.42                  | 2.11                                   | 1.74                  |
| 2 | Ni <sub>1</sub> /h-BN-B-D | 1.48                                                 | 1.30                  | 2.78                                   | 2.61                  |
| 3 | Ni <sub>2</sub> /h-BN     | 0.11                                                 | -0.04                 | 1.11                                   | 0.22                  |
| 4 | Ni <sub>2</sub> /h-BN-B-D | 0.36                                                 | 0.35                  | 1.42                                   | 0.24                  |

**Table S3** Adsorption energy of key species involved in DRM over Ni<sub>2</sub>/h-BN, Ni<sub>2</sub>/h-BN-B-D and Ni(111) (eV).

|                   | Ni <sub>2</sub> /h-BN | Ni <sub>2</sub> /h-BN-B-D | Ni(111) <sup>[1]</sup> |
|-------------------|-----------------------|---------------------------|------------------------|
| CH <sub>4</sub>   | -0.58                 | -0.84                     | -0.02                  |
| CH <sub>3</sub>   | -3.74                 | -2.63                     | -1.92                  |
| CH <sub>2</sub>   | -4.29                 | -3.86                     | -4.01                  |
| CH                | -5.11                 | -4.84                     | -6.43                  |
| C                 | -6.40                 | -6.02                     | -6.78                  |
| CH <sub>3</sub> O | -3.95                 | -2.55                     | -2.36                  |
| CH <sub>2</sub> O | -2.67                 | -1.14                     | -0.75                  |
| CHO               | -4.05                 | -2.90                     | -2.26                  |
| CO <sub>2</sub>   | -2.05                 | -1.57                     | -0.02                  |
| CO                | -3.45                 | -2.48                     | -1.92                  |
| COOH              | -3.26                 | -2.83                     | -2.26                  |
| OH                | -5.19                 | -3.82                     | -3.42                  |
| O                 | -6.33                 | -5.38                     | -5.67                  |
| H                 | -3.58                 | -2.67                     | -2.81                  |
| H <sub>2</sub> O  | -0.57                 | -1.01                     | -0.29                  |

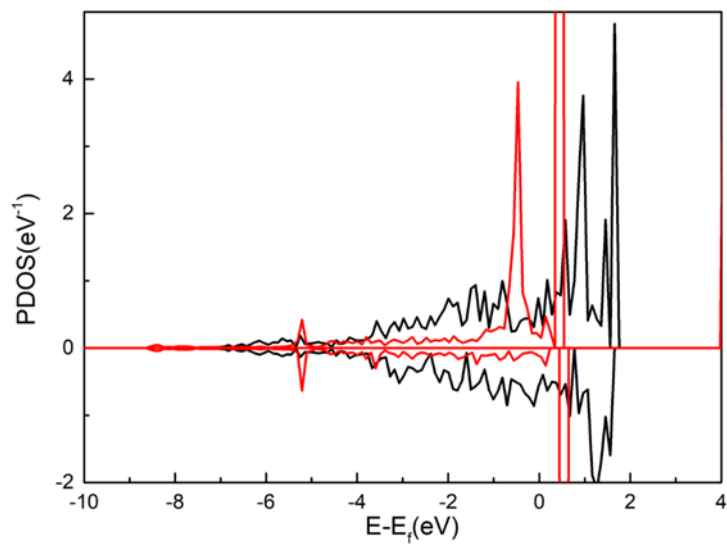

**Fig.S1** Partial density of state (PDOS) of Ni<sub>2</sub> adsorbed on perfect h-BN surface (red) and B-defect h-BN surface (black).All the Fermi levels are shifted to 0.0 eV.

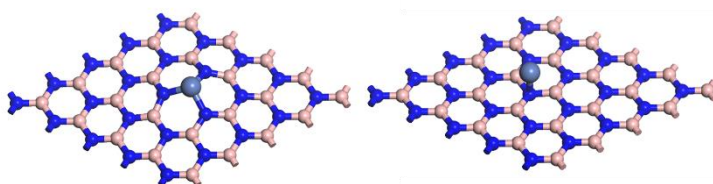

**Fig. S2** Single Ni adsorption configuration on B-defected (left) and perfect (right) h-BN

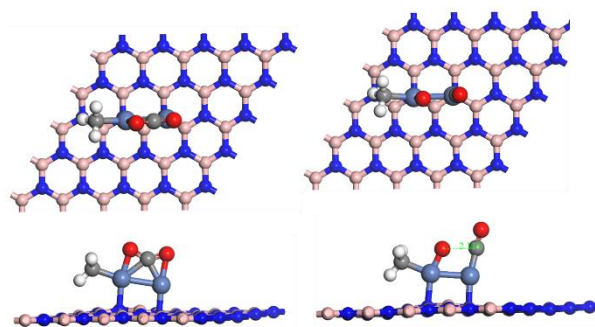

**Fig. S3.** IS and TS configurations of the CO<sub>2</sub> direct activation on Ni<sub>2</sub>/h-BN In the presence of CH<sub>3</sub>.

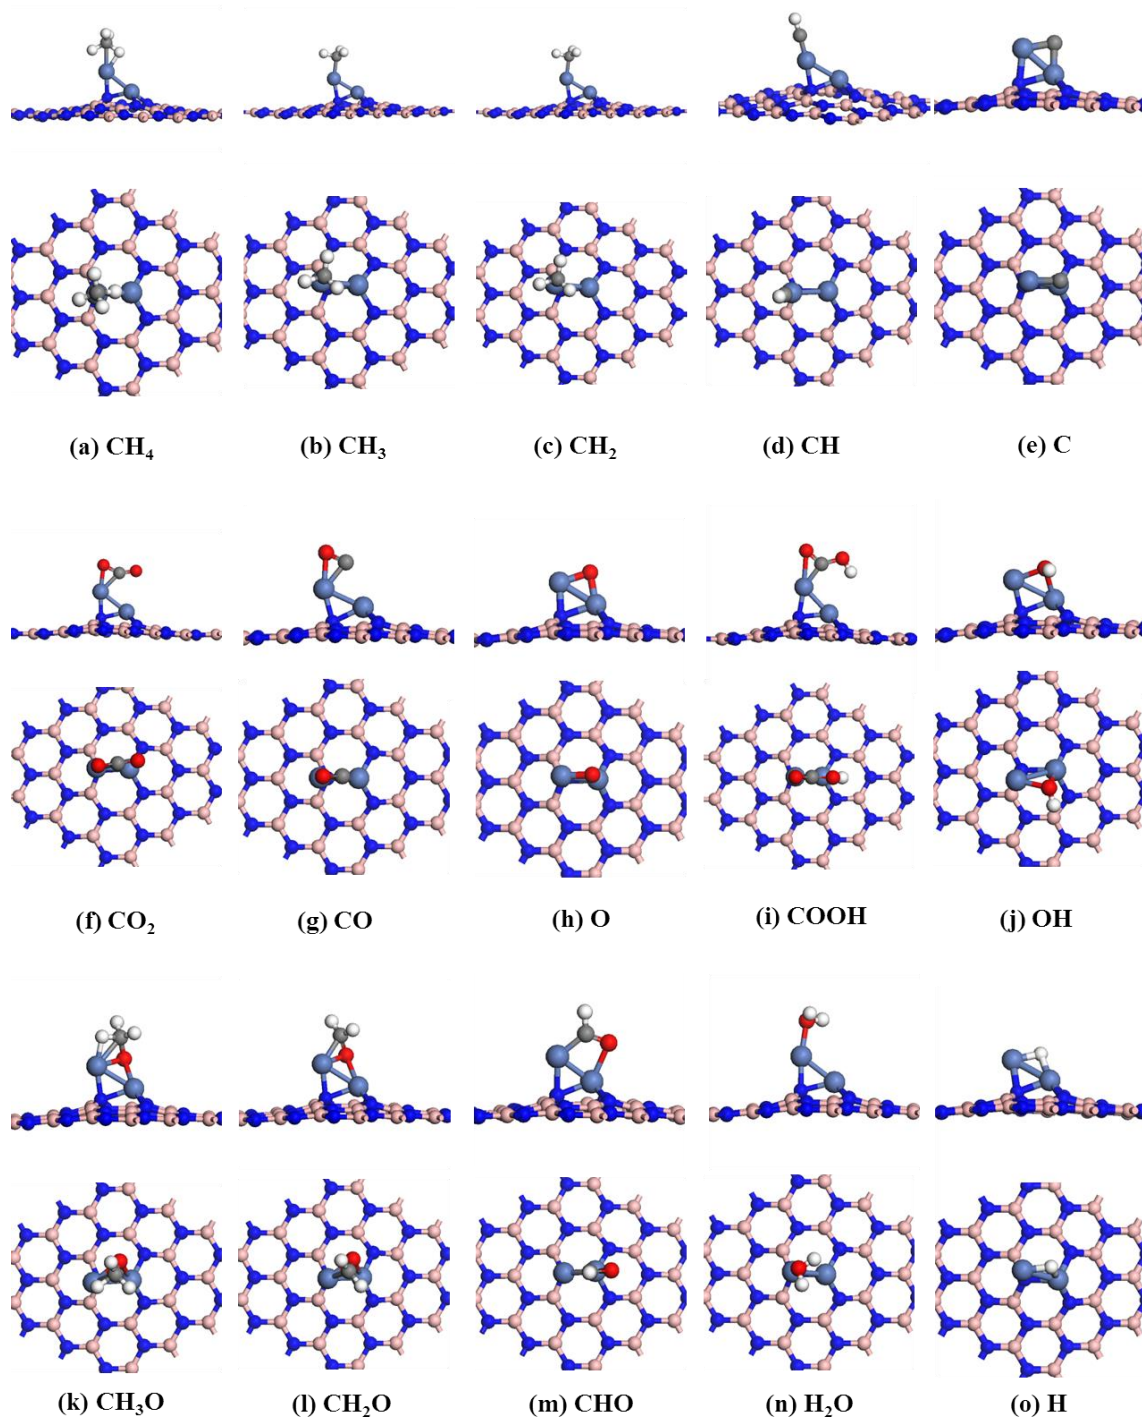

**Fig. S4** Most stable adsorption structures for the intermediates on Ni<sub>2</sub>/h-BN-B-D. The red, white and gray balls denote the O, H and C atoms, respectively.

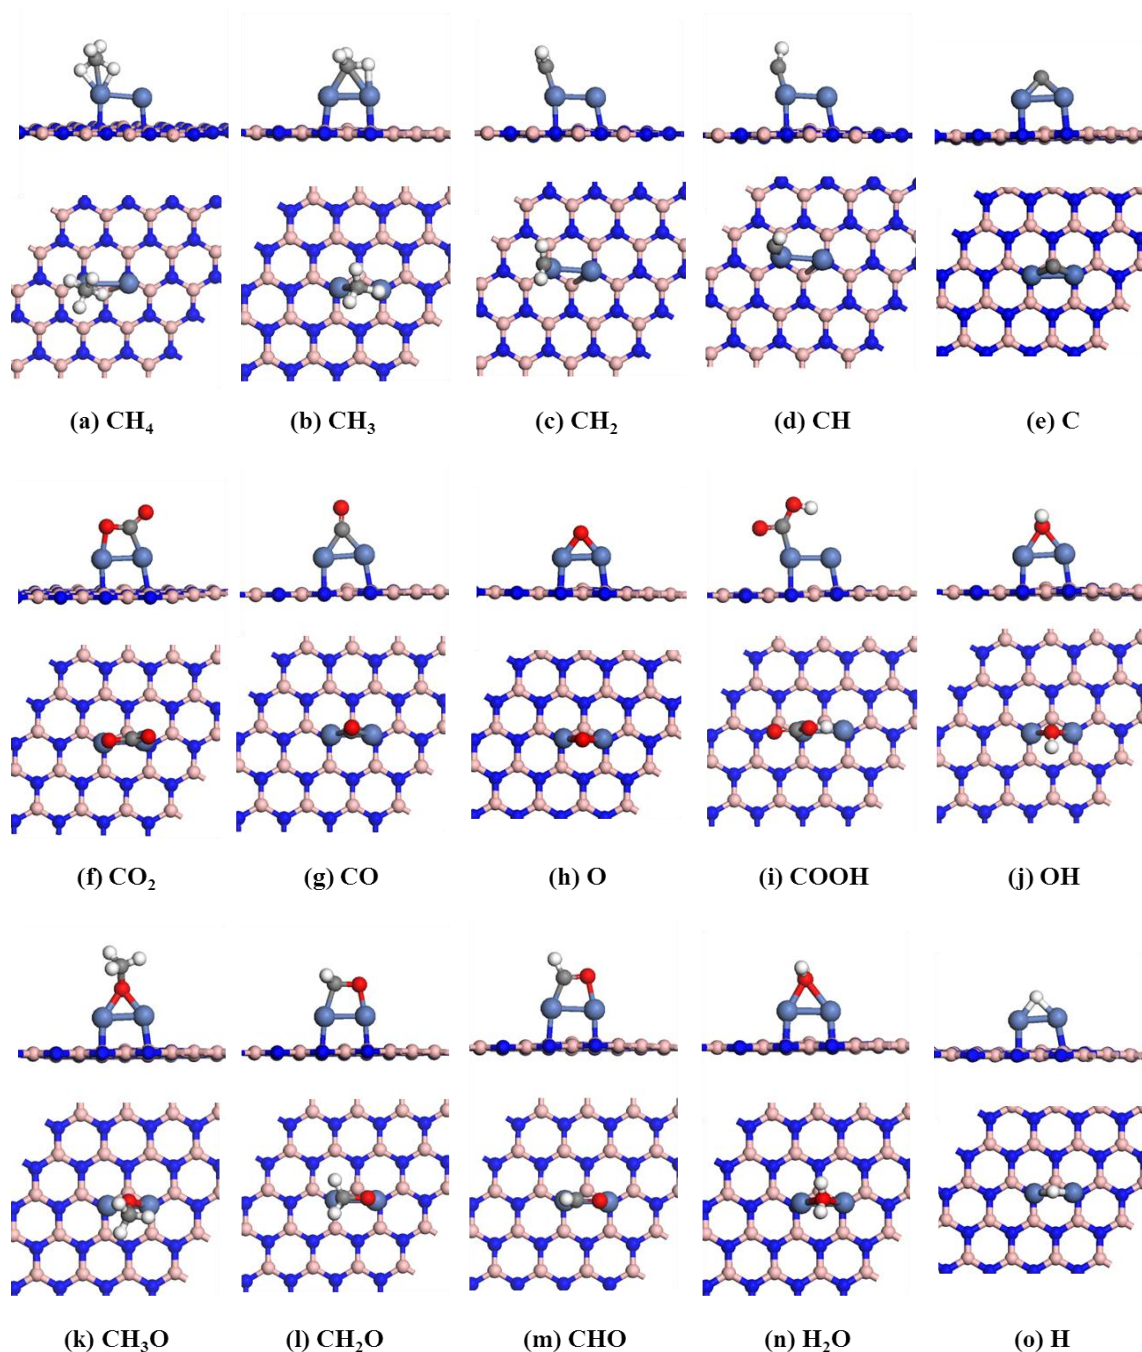

**Fig. S5** Most stable adsorption structures for the intermediates on Ni<sub>2</sub>/h-BN. The red, white and gray balls denote the O, H and C atoms, respectively.

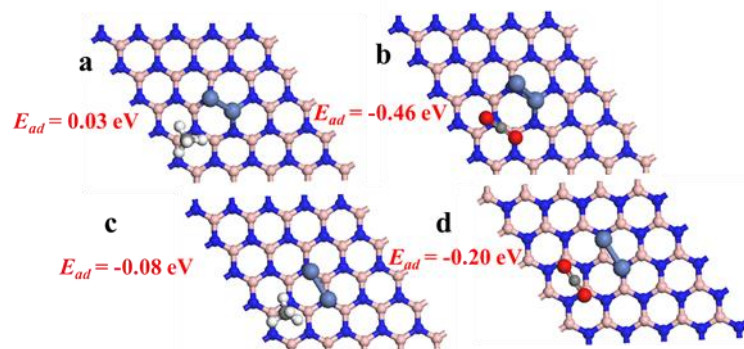

**Fig.S6** Most stable adsorption structures and adsorption energy of CH<sub>4</sub> and CO<sub>2</sub> over h-BN in DRM on Ni<sub>2</sub>/h-BN-B-D(a,b) and Ni<sub>2</sub>/h-BN(c,d). The red, white and gray balls denote the O, H and C atoms, respectively.

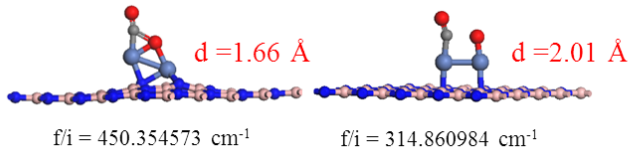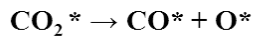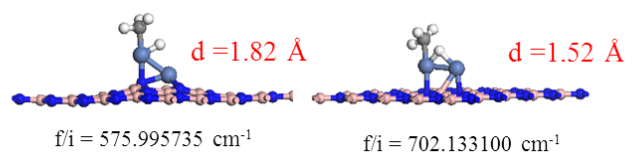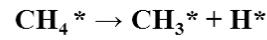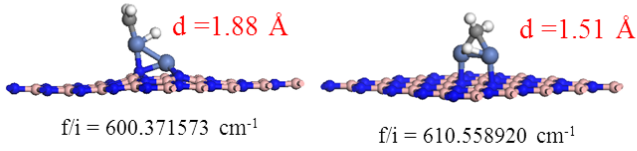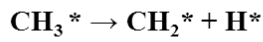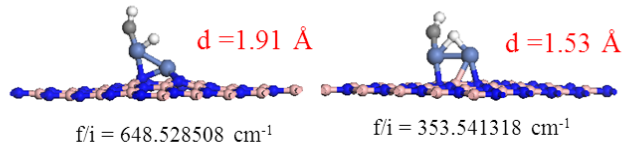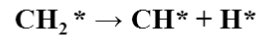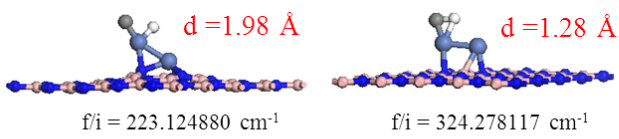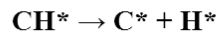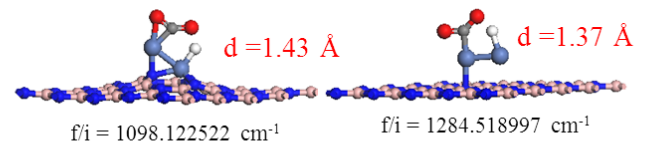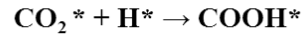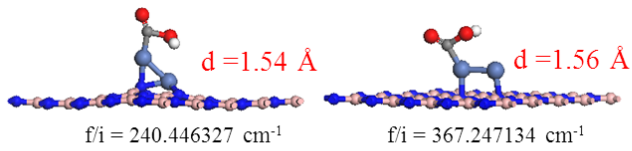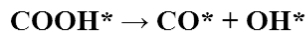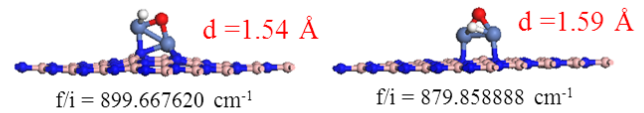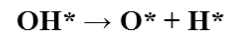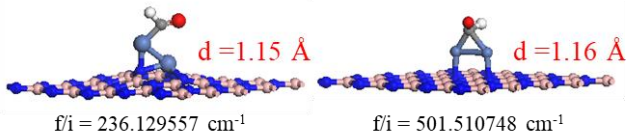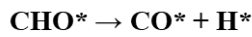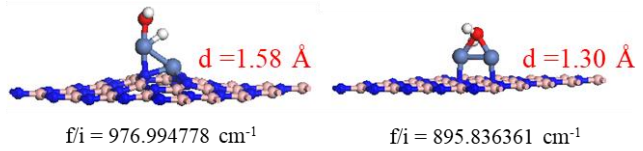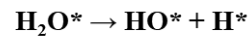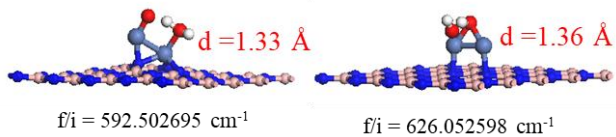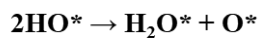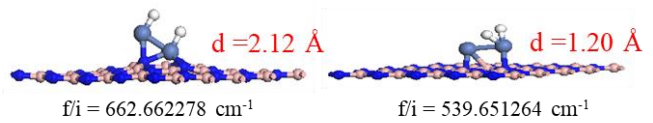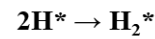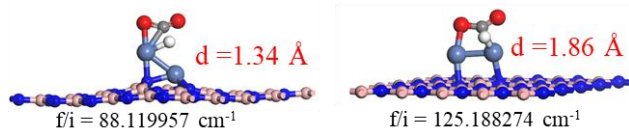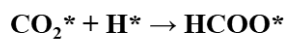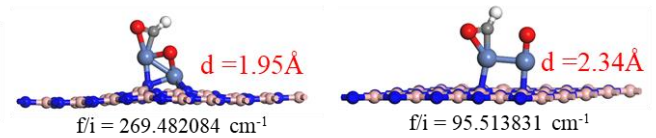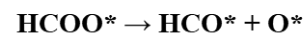

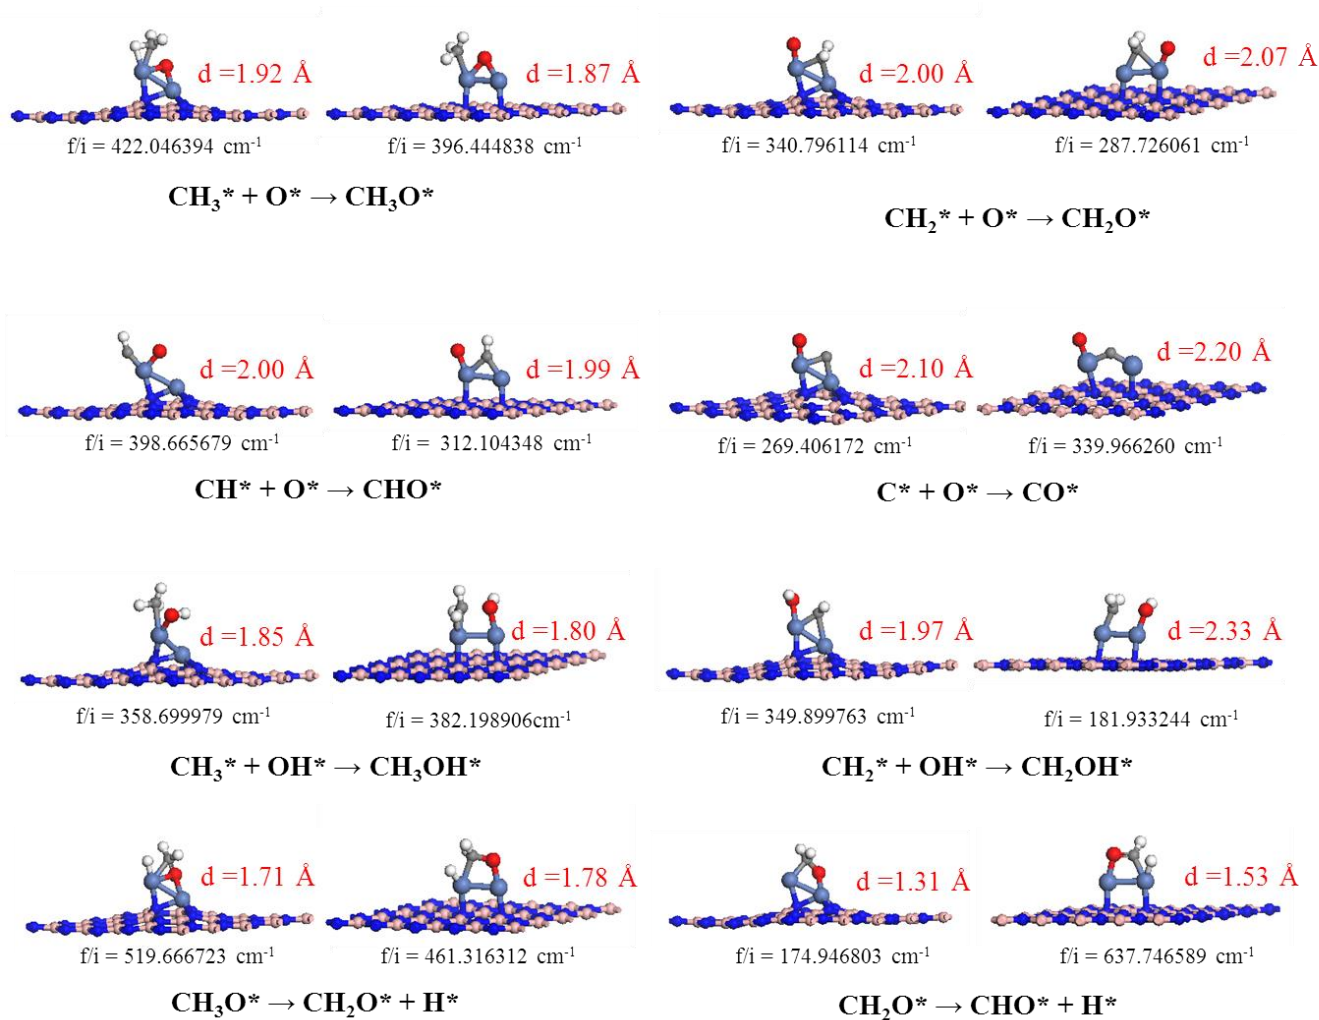

**Fig.S7** TSs configuration in DRM on  $\text{Ni}_2/\text{h-BN-B-D}$  and  $\text{Ni}_2/\text{h-BN}$ . The red, white and gray balls denote the O, H and C atoms, respectively.

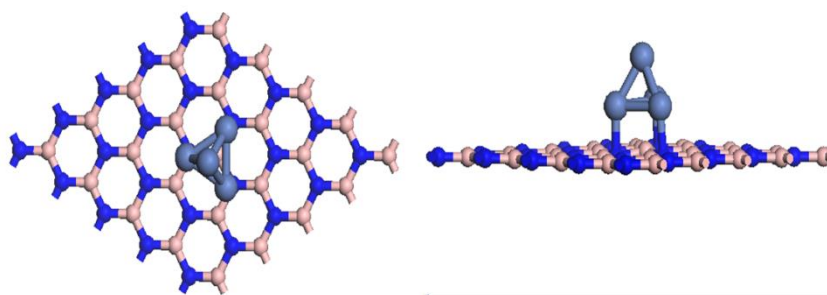

**Fig.S8** Top and side view of  $\text{Ni}_4$  adsorption configuration on perfect h-BN.

## Reference

- [1] W. K. Yuan, Y.A. Zhu, *Catalysis Today*. **2009**, *148*, 260–267.
- [2] Chase, M.W., Jr., *NIST-JANAF Thermochemical Tables, Fourth Edition*, J. Phys. Chem. Ref. Data, Monograph 9, **1998**,

1-1951.
